# Supplementary material for: Super-Enhancers Promote Transcriptional Dysregulation in Nasopharyngeal Carcinoma
Source: Oxford University Press journal article supplement (doi:10.1158/0008-5472.can-17-1143), 2017-09-26
Supplement: 00085472can171143-sup-182125_2_supp_4281296_pwkpdb.pdf [file 00085472can171143-sup-182125_2_supp_4281296_pwkpdb.pdf]

# Supplementary Figures

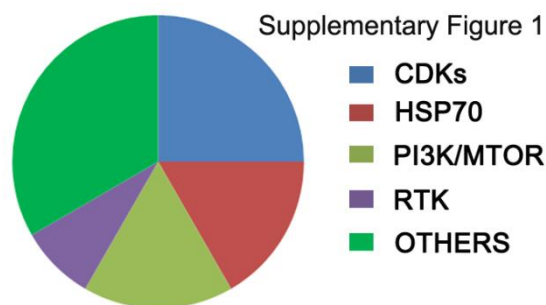

**Supplementary Figure 1. Distribution of putative targets of the top-ranked small molecules**

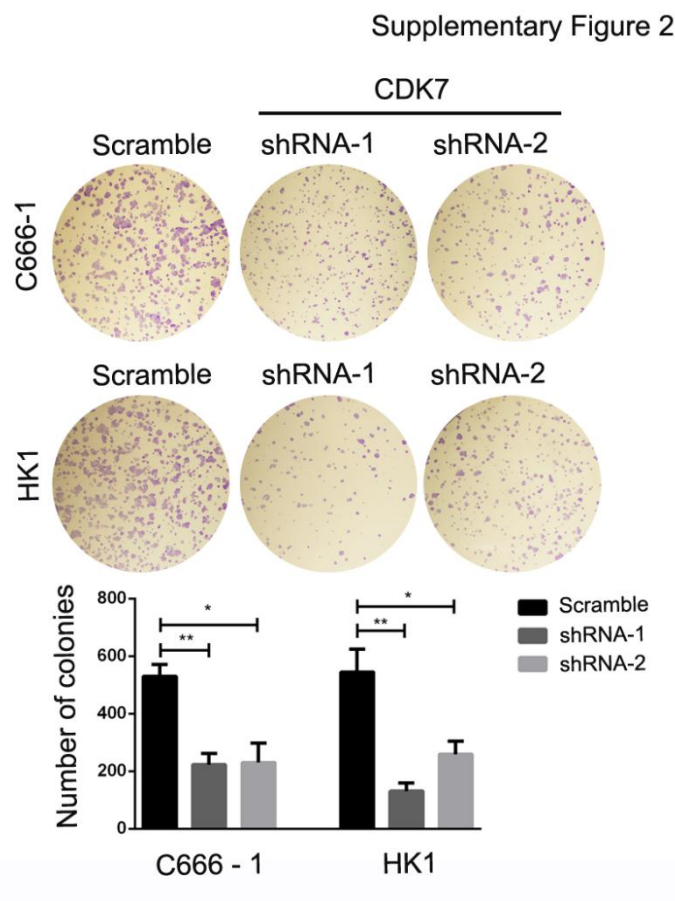

**Supplementary Figure 2. CDK7 silencing significantly inhibited cells growth**

Representative images and statistical analysis of the colony formation assay in

C666-1 and HK1 cells transduced with either scramble or CDK7 shRNA virus (top figure). Results are shown as mean  $\pm$  SD of 3 independent experiments. \*  $P < 0.05$ , \*\* $P < 0.01$  (bottom figure).

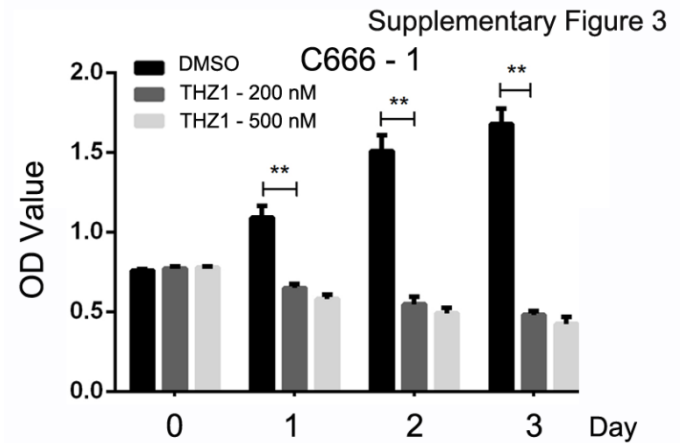

**Supplementary Figure 3. Cell viability assay of C666-1 cells treated with THZ1**

Cell viability assay showed the effects of THZ1 treatment in C666-1 cell lines at 1, 2 and 3 days. Bars represent mean  $\pm$  SD of 3 experiments (\*\*  $P < 0.01$ ).

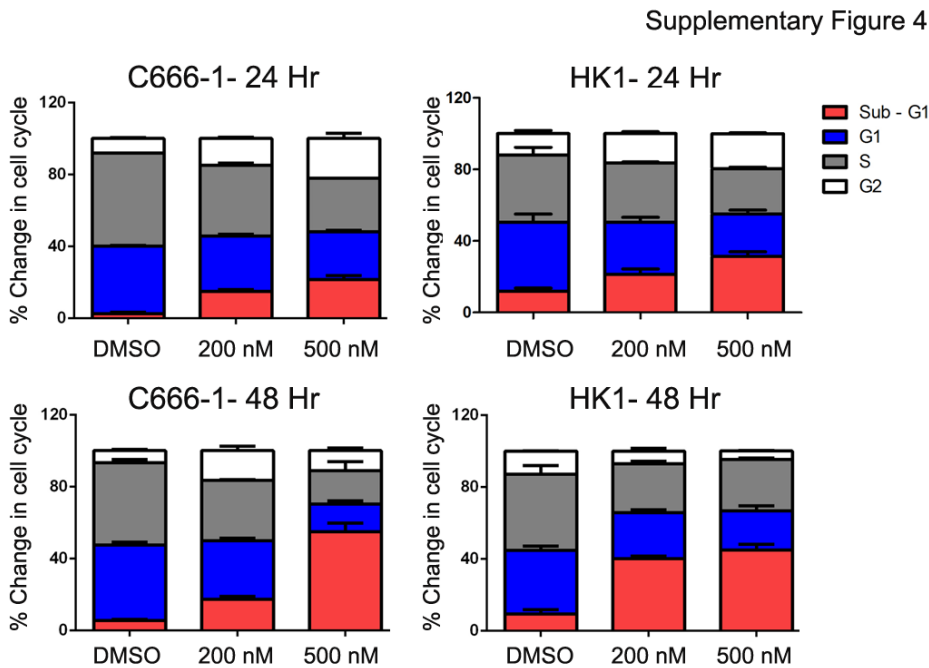

**Supplementary Figure 4. Cell-cycle arrested at G2/M stage in C666-1 and HK1 cells treated with THZ1**

C666-1 and HK1 cells were treated with indicated concentrations of THZ1 for either 24 or 48 hr and analyzed by flow cytometry.

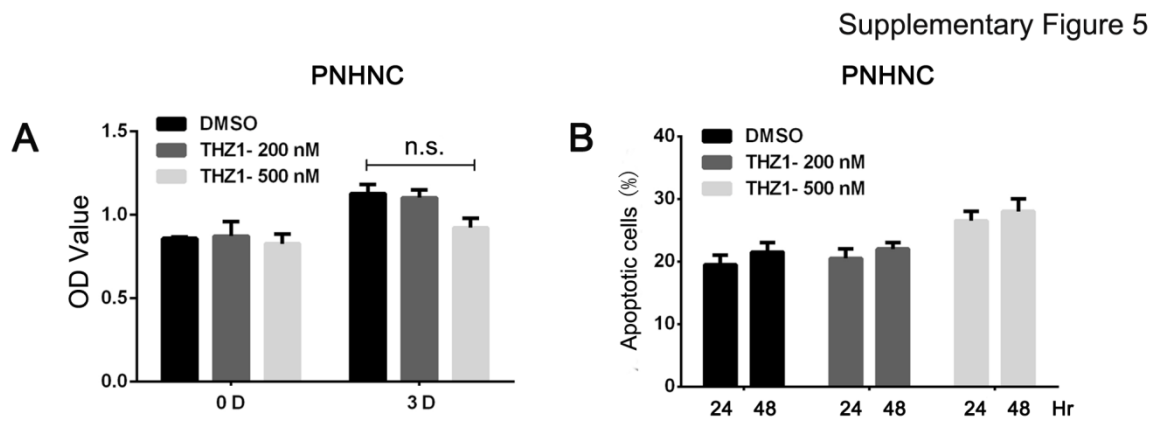

**Supplementary Figure 5. Cell viability (A) and apoptosis assay (B) showing the effects of THZ1 treatment in PNHNC**

Supplementary Figure 6

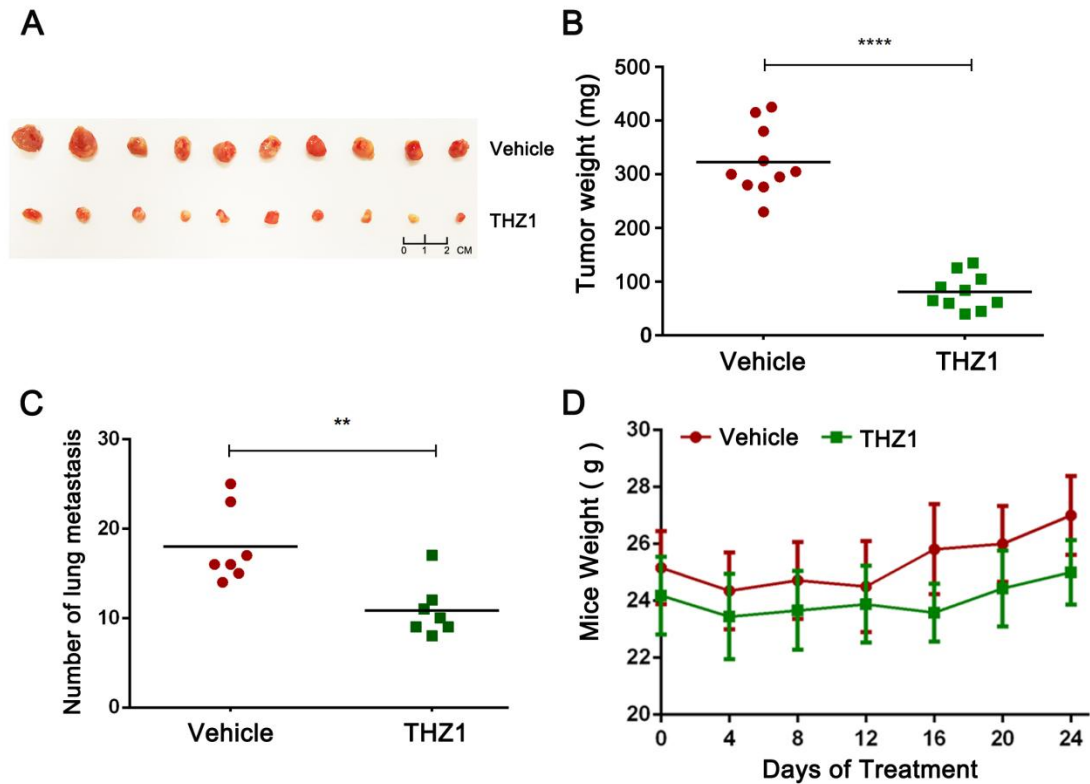

**Supplementary Figure 6. THZ1 potently suppressed xenografts growth and lung metastasis of NPC cells in NOD/SCID mice**

(A) Photograph of tumors from both vehicle and THZ1 (twice daily, 10 mg/kg, 24 days) treatment groups. (B) At day 24 after injection, tumors weights were measured and presented as mean  $\pm$  SD (\*\*\*\* P < 0.0001). (C) Visible lung metastases were counted and graphed (\*\* P < 0.01). (D) During 24 days of THZ1 treatment, no significant loss of weight was observed in the mice.

Supplementary Figure 7

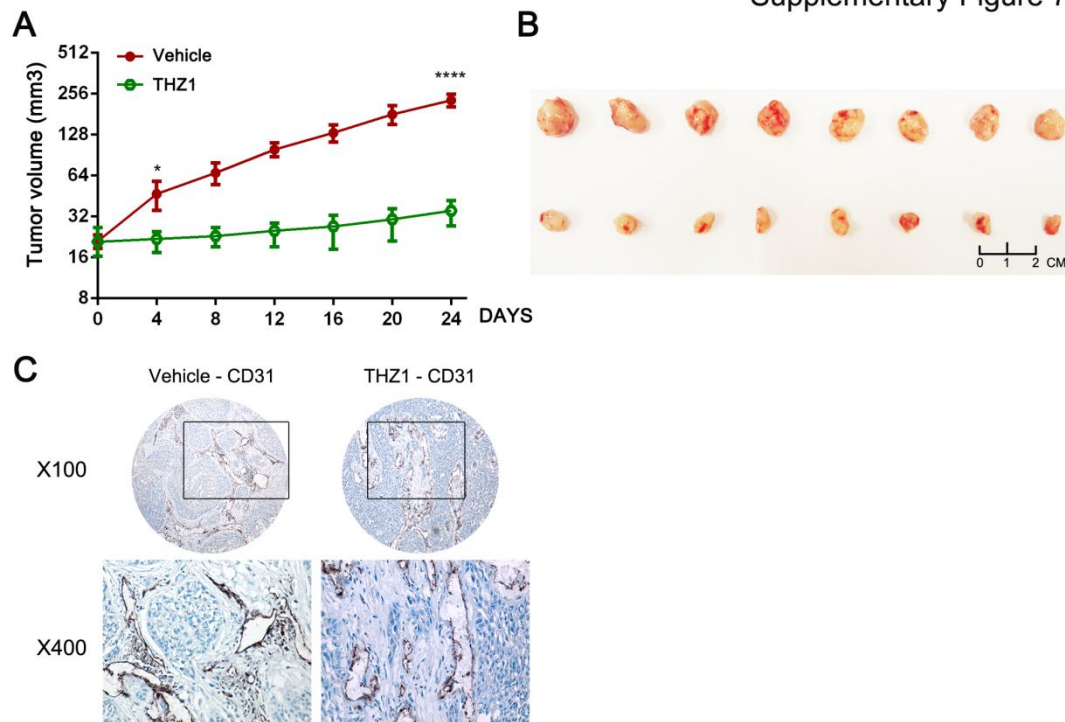

**Supplementary Figure 7. THZ1 exhibited prominent anti-NPC activity in NOD/SCID mice**

(A) Growth curve of xenograft treated with either THZ1 or vehicle. Data represent means  $\pm$  SD. \*  $P < 0.05$ , \*\*\*\*  $P < 0.0001$ . (B) Photograph of tumors from both vehicle and THZ1 treated groups. (C) IHC staining of CD31 in xenograft tissue sections. Original magnification,  $\times 100$  and  $\times 400$ .

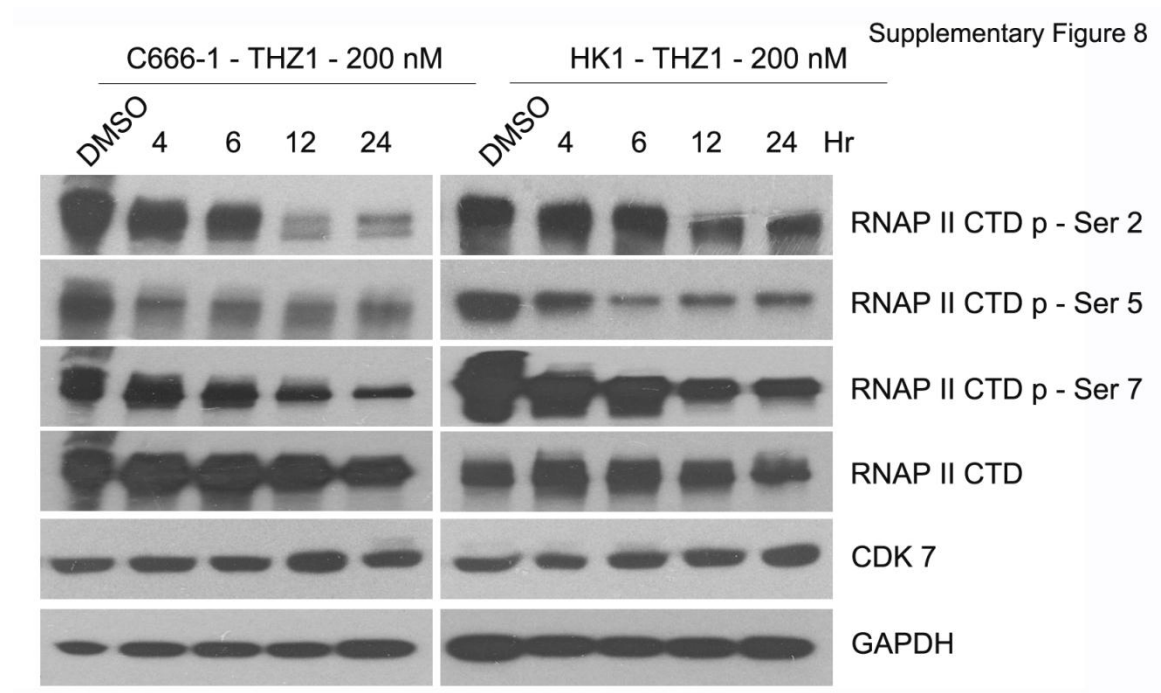

**Supplementary Figure 8. THZ1 inhibited RNAPII-mediated transcription in NPC**

Levels of RNA Pol II CTD phosphorylation in C666-1 and HK1 cells were decreased after treatment with either 200 nM THZ1 or DMSO at indicated time points.

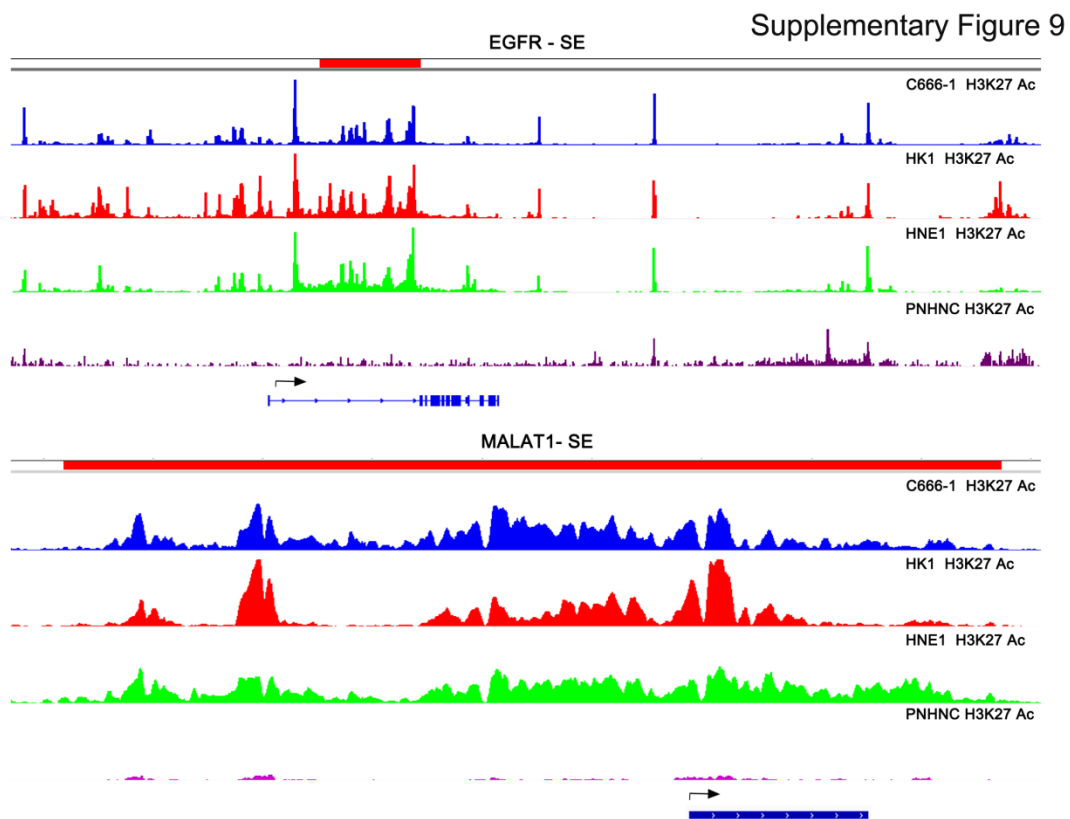

**Supplementary Figure 9. Representative SE-associated genes in NPC and PNHNC**

ChIP-seq profiles for H3K27ac binding at EGFR and MALAT1 gene locus in C666-1, HK1, HNE1 and PNHNC cells.

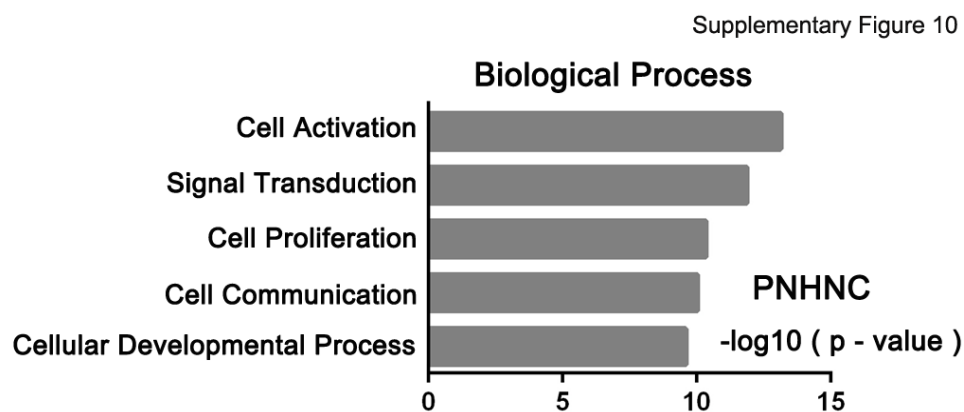

**Supplementary Figure 10. Gene Ontology enrichment analysis of SE-associated**

genes in PNHNC cells.

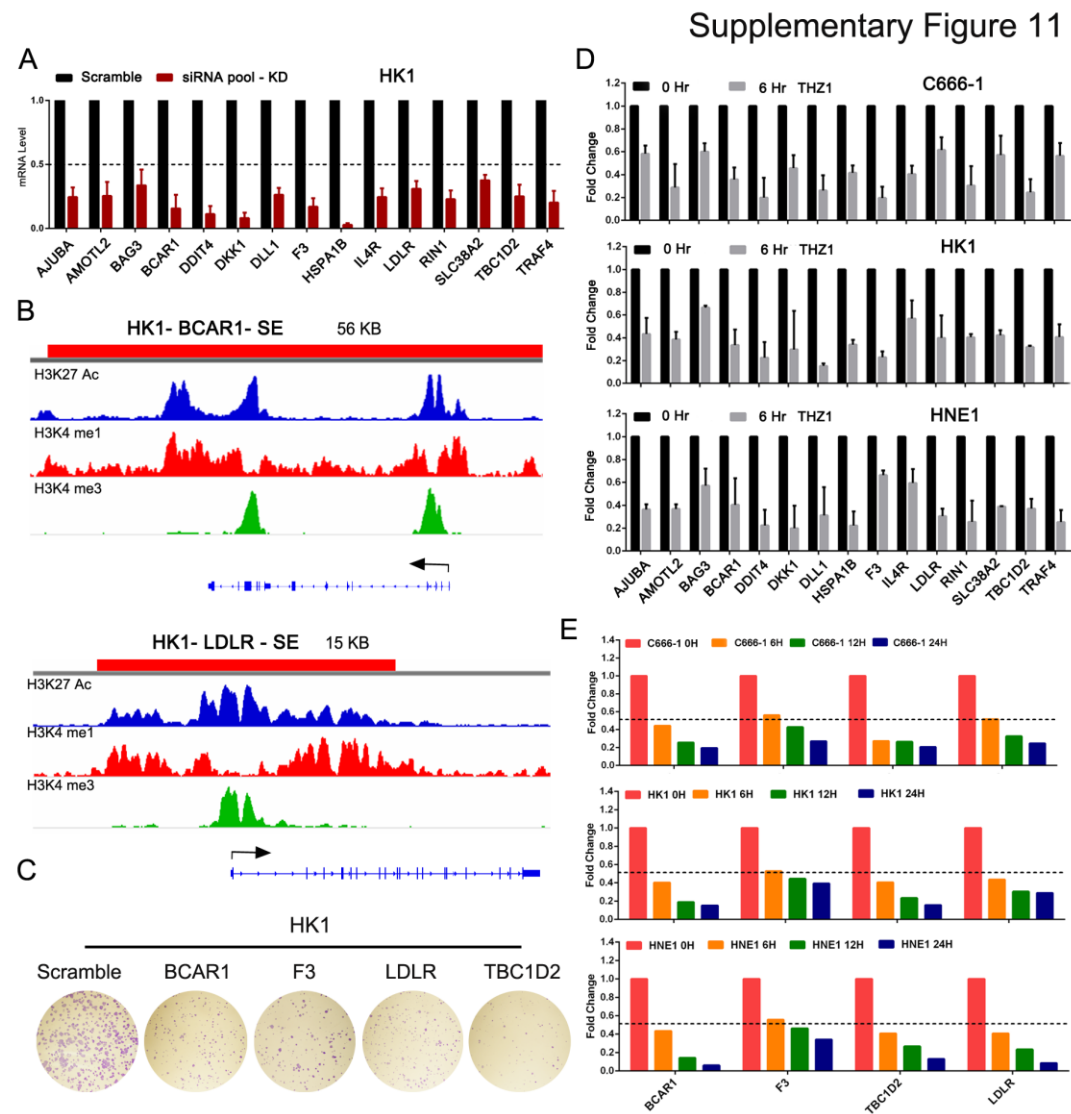

**Supplementary Figure 11. Identification of novel SE-associated oncogenes in NPC**

(A) Real-time PCR validation of the silencing by each siRNAs. (B) H3K27ac ChIP-seq profiles of BCAR1 and LDLR in HK1 cells. (C) Representative results of colony formation of HK1 cells transfected with indicated siRNAs. (D) Real-time PCR demonstrating sensitivity of the candidate genes to THZ1 treatment. (E) Real-time



PCR analysis showing that the RNA levels of BCAR1, F3, LDLR and TBC1D2 were rapidly decreased at indicated time points by THZ1 treatment.

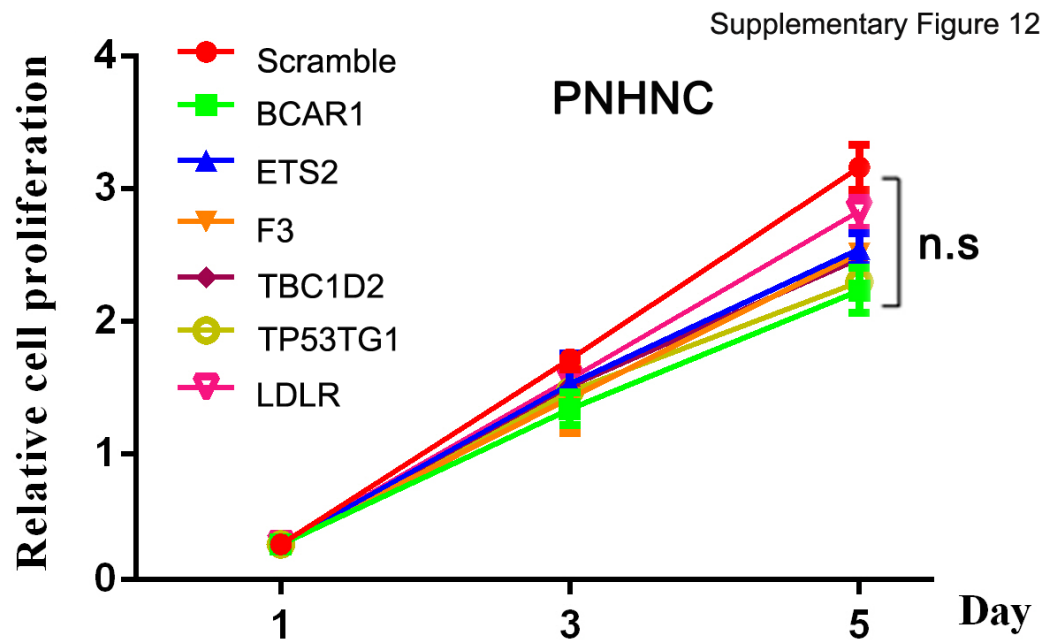

**Supplementary Figure 12. Cell viability assay of PNHNC cells upon SE-associated genes knockdown**

Cell viability assay showing the effects of silencing of candidate SE-associated genes in PNHNC cells, n.s. = Not significant.

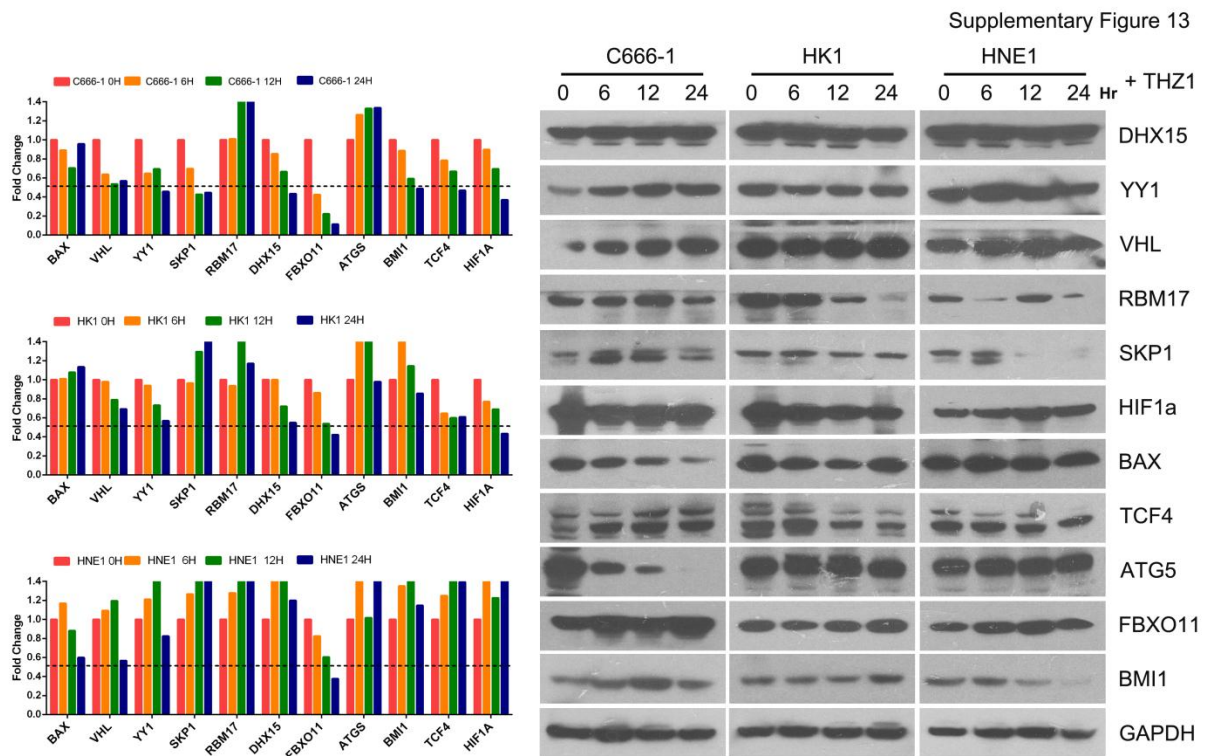

**Supplementary Figure 13. TE-associated genes were less sensitive to THZ1 treatment compared with SE-associated genes**

Eleven TE-associated genes were randomly selected, and fold change of their mRNA and protein levels following THZ1 treatment were quantified by real-time PCR (left) and immunoblotting assays (right).

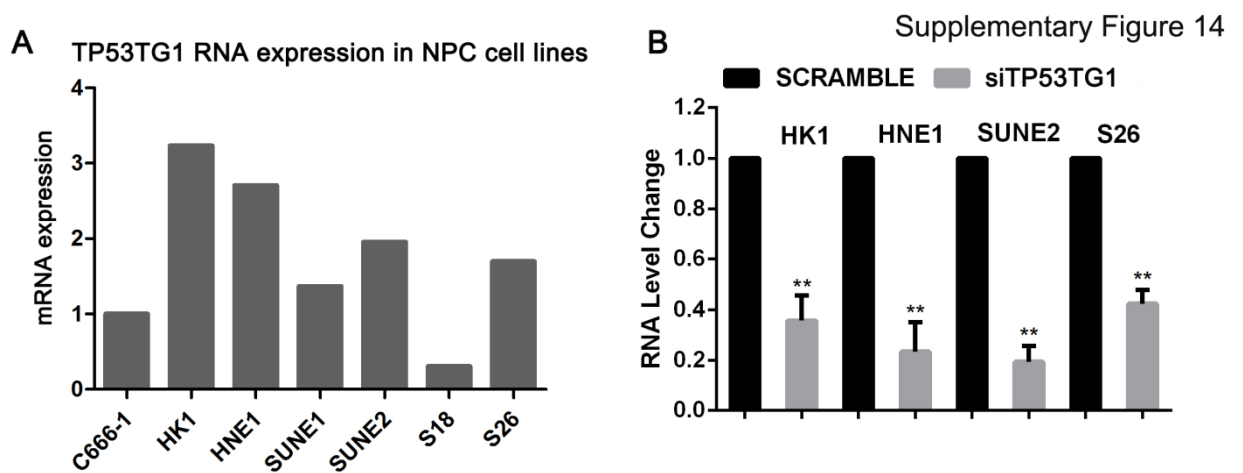

**Supplementary Figure 14. Function of a novel SE-associated LncRNA, TP53TG1, in NPC cell lines**

(A) Real-time PCR analysis showing TP53TG1 RNA expression level in different NPC cell lines. (B) Real-time PCR validation of the knockdown effect of siRNA targeting TP53TG1.

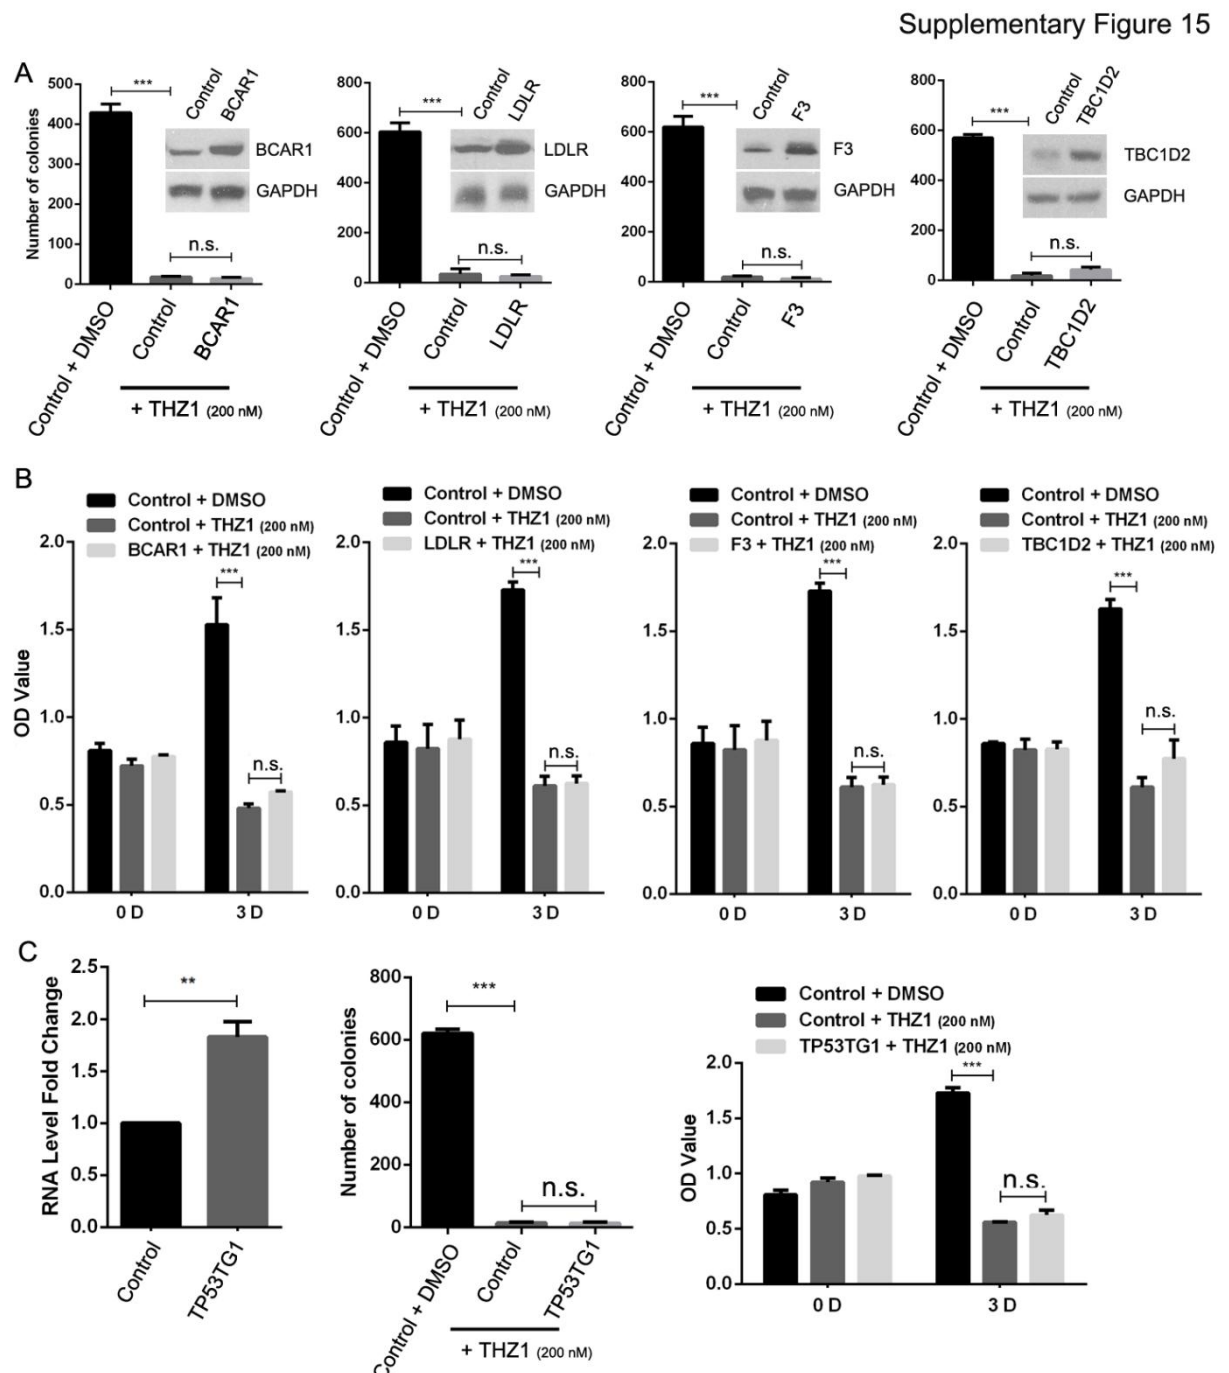

**Supplementary Figure 15. Over-Expression of Candidate SE-associated oncogenes cannot alleviating the cell toxicity elicited by THZ1**

Statistical analysis of colony formation (A) and cell proliferation (B) in NPC cells treated with THZ1, in the presence or absence of over-expression of BCAR1, F3, LDLR, and TBC1D2. (C) Real-time PCR analysis of TP53TG1 over-expression (left), colony formation (middle) and cell proliferation (right) in TP53TG1 over-expressed cells treated with THZ1. Results are shown as mean  $\pm$  SD of 3 independent experiments. \*\*P < 0.01, \*\*\*P < 0.001, n.s. = Not significant.

Supplementary Figure 16

| C666-1               |                                                                                     |           | HNE1                 |                                                                                       |           |
|----------------------|-------------------------------------------------------------------------------------|-----------|----------------------|---------------------------------------------------------------------------------------|-----------|
| Transcription Factor | Motif                                                                               | p - value | Transcription Factor | Motif                                                                                 | p - value |
| MAFK                 |    | 1e-11     | MAFK                 |    | 1e-8      |
| TEAD1                |   | 1e-6      | TEAD1                |   | 1e-4      |
| ETS2                 |  | 1e-3      | ETS2                 |  | 1e-4      |

**Supplementary Figure 16. SE-promoting master TFs in NPC**

Binding motifs for MAFK, TEAD1 and ETS2, as well as their p values for the enrichment in SE constituent enhancers in C666-1 and HNE1 cells.

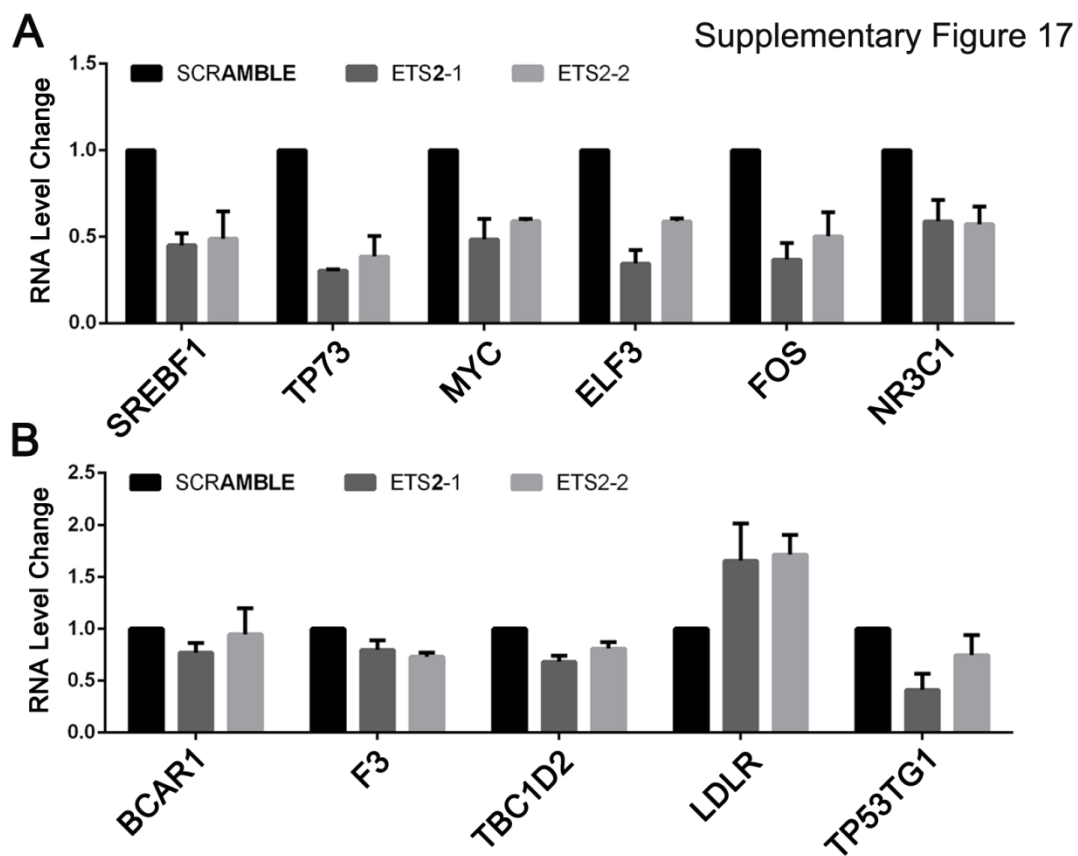

**Supplementary Figure 17. Real-time PCR analysis showing that the RNA levels of oncogenes (A) and candidate oncogenes (B) upon ETS2 silencing.**
